# Supplementary material for: Isolation and Characterization of a Variant Psedorabies Virus HNXY and Construction of rHNXY-∆TK/∆gE
Source: MDPI journal article supplement (doi:10.3390/ani10101804), 2020-10-04
Supplement: s1 [file s1]

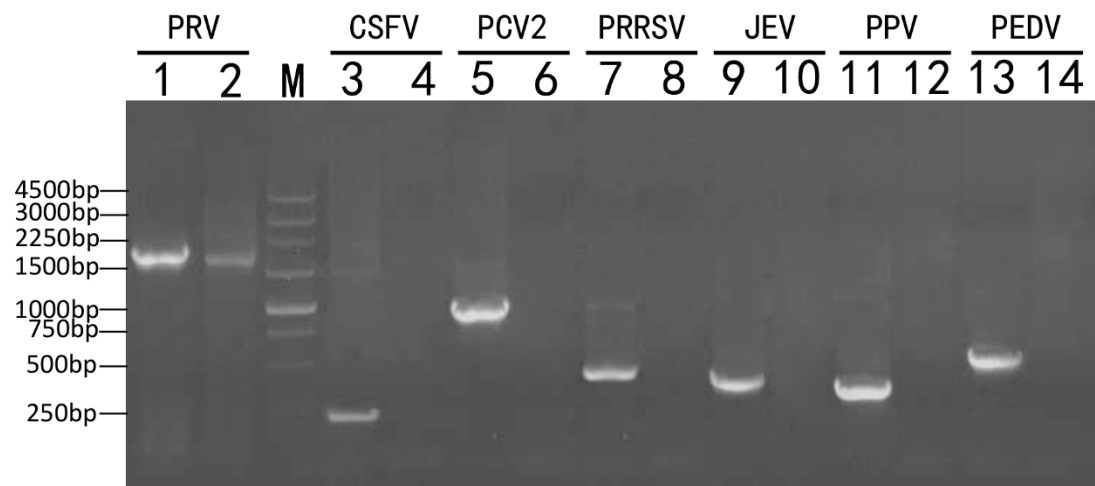

**Figure S1. Identification of the cell cultures.** M: 250bp Ladder DNA Marker; Line 1, 3, 5, 7, 9, 11 and 13 were the positive control for PRV, CSFV, PCV2, PRRSV, JEV, PPV and PEDV, respectively; Line 2 showed PRV positive of the cell culture, while line 4, 6, 8, 10, 12 and 14 showed negative for other pathogens.
